# Supplementary material
Source: publisher figshare collection journal article supplement (https://gsajournals.figshare.com/ndownloader/files/28547742)
Supplement: Supplementary file 1 [file 28547742]

Table S6. Locations of Tup1 peaks within each k-means ChIP-Seq cluster.

| Cluster | Intergenic | Pol III, snRNA | UTR, ORF | Total |
| --- | --- | --- | --- | --- |
| 1 | 104 (77%) | 10 (7%) | 21 (16%) | 135 |
| 2 | 63 (84%) | 3 (4%) | 9 (12%) | 75 |
| 3 | 52 (23%) | 53 (24%) | 119 (53%) | 224 |
| 4 | 97 (88%) | 0 (0%) | 13 (12%) | 110 |
| 5 | 120 (85%) | 2 (2%) | 19 (13%) | 120 |
| 6 | 64 (83%) | 1 (1%) | 12 (16%) | 77 |
| 7 | 176 (74%) | 1 (<1%) | 61 (26%) | 238 |
| 8 | 94 (35%) | 127 (48%) | 45 (17%) | 266 |
